# Supplementary material for: CO2 Pressure-Dependent Microstructure and Morphology of Carbon for Energy Storage: Unraveling the Role of CO2 in Green Synthesis of Carbon Materials
Source: MDPI journal article supplement (doi:10.3390/batteries9020130), 2023-02-12
Supplement: s1 [file s1]

## Supplementary Information

# CO<sub>2</sub> pressure-dependent microstructure and morphology of carbon for energy storage: Unraveling the role of CO<sub>2</sub> in green synthesis of carbon materials

Peng Li<sup>†,1,2</sup> Yun Chen<sup>†,1,2</sup> Chu Liang<sup>\*,1,2,3</sup> Chengfu Zeng,<sup>2</sup> Xiaoyu(Baohua) Zhang,<sup>2</sup> Haichang Zhong<sup>\*,1</sup> Wenxian Zhang,<sup>1</sup> Xiaohua Zheng<sup>2</sup> and Mingxia Gao<sup>2,3</sup>

<sup>1</sup>Fujian Provincial Key Laboratory of Functional Materials and Applications & School of Materials Science and Engineering, Xiamen University of Technology, Xiamen 361024, China.

<sup>2</sup>Zhejiang Carbon Neutral Innovation Institute & College of Materials Science and Engineering, Zhejiang University of Technology, Hangzhou 310014, China.

<sup>3</sup>State Key Lab of Silicon Materials, Zhejiang University, Hangzhou 310027, China.

<sup>†</sup> Both authors contributed equally to this work. .

\* Correspondence: Corresponding authors: cliang@zjut.edu.cn; hczhong@xmut.edu.cn.

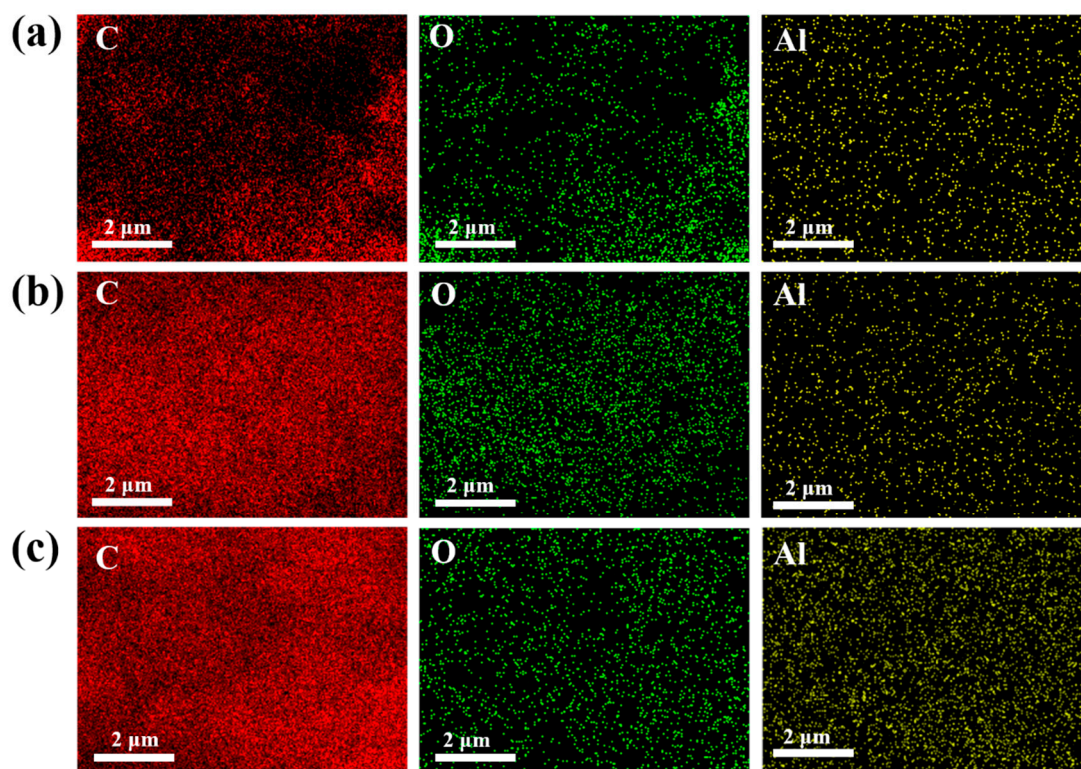

Supplementary Figure S1. EDS mapping of (a) Carbon-1 bar, (b) Carbon-30 bar and (c) Carbon-60 bar.
